# Supplementary material for: In-Silico Screening of Novel Synthesized Thienopyrimidines Targeting Fms Related Receptor Tyrosine Kinase-3 and Their In-Vitro Biological Evaluation
Source: MDPI journal article supplement (doi:10.3390/ph15020170), 2022-01-29

# **In-Silico Screening of Novel Synthesized Thienopyrimidines Targeting Fms Related Receptor Tyrosine Kinase-3 and Their *In-Vitro* Biological Evaluation**

Elshaymaa I. Elmongy 1,2,\*, Najla Altwaijry 1, Nashwah G. M. Attallah 1,3, Manal Mubarak  
AlKahtani 4 and Hanan Ali Henidi 4

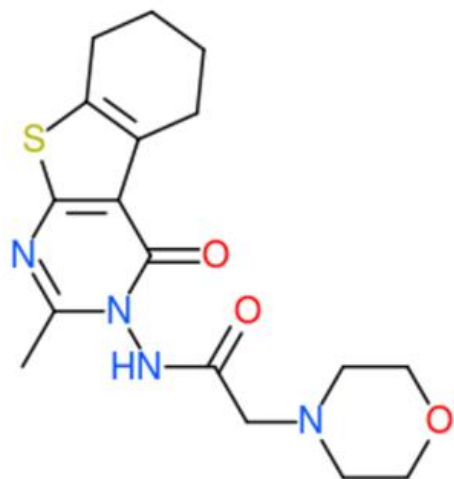

## Molecular Properties and Drug-likeness.

**Molecular formula:** C<sub>17</sub> H<sub>22</sub> N<sub>4</sub> O<sub>3</sub> S

**Molecular weight:** 362.14

**Number of HBA:** 6

**Number of HBD:** 1

**MolLogP :** 0.94

**MolLogS :** -1.40 (in Log(moles/L)) 14550.50 (in mg/L)

**MolPSA :** 62.31 Å<sup>2</sup>

**MolVol :** 385.55 Å<sup>3</sup>

**pKa of most Basic/Acidic group :** 4.76 / 10.80

$$pK_a = -\log_{10} K_a = \log_{10} \frac{[HA]}{[A^-][H^+]}$$

**BBB Score :** 3.60 The Blood-Brain Barrier (BBB) Score: 6-High,0-Low (DOI: 10.1021/acs.jmedchem.9b01220)

**Number of stereo centers:** 0

## Molecular Properties and Drug-likeness.

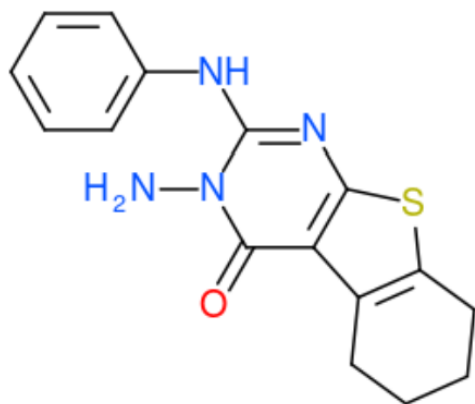

**Molecular formula:** C<sub>16</sub> H<sub>16</sub> N<sub>4</sub> O S

**Molecular weight:** 312.10

**Number of HBA:** 4

**Number of HBD:** 3

**MolLogP :** 3.14

**MolLogS :** -3.71 (in Log(moles/L)) 60.86 (in mg/L)

**MolPSA :** 50.87 Å<sup>2</sup>

**MolVol :** 307.14 Å<sup>3</sup>

**pKa of most Basic/Acidic group :** -2.07 / 15.42

$$pK_a = -\log_{10} K_a = \log_{10} \frac{[HA]}{[A^-][H^+]}$$

**BBB Score :** 4.01 The Blood-Brain Barrier (BBB) Score: 6-High,0-Low (DOI: 10.1021/acs.jmedchem.9b01220)

**Number of stereo centers:** 0

## Molecular Properties and Drug-likeness.

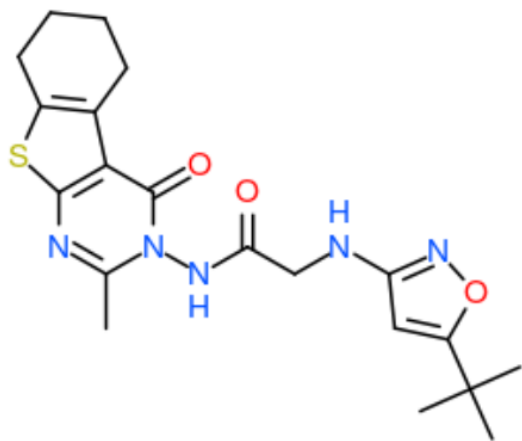

**Molecular formula:** C<sub>20</sub> H<sub>25</sub> N<sub>5</sub> O<sub>3</sub> S

**Molecular weight:** 415.17

**Number of HBA:** 6

**Number of HBD:** 2

**MolLogP :** 3.23

**MolLogS :** -3.75 (in Log(moles/L)) 73.61 (in mg/L)

**MolPSA :** 83.28 Å<sup>2</sup>

**MolVol :** 443.53 Å<sup>3</sup>

**pKa of most Basic/Acidic group :** 3.09 / 11.69

$$pK_a = -\log_{10} K_a = \log_{10} \frac{[HA]}{[A^-][H^+]}$$

**BBB Score :** 3.10 The Blood-Brain Barrier (BBB) Score: 6-High,0-Low (DOI: 10.1021/acs.jmedchem.9b01220)

**Number of stereo centers:** 0

# H-NMR

---

PROTON DMSO {C:\Bruker\TOPSPIN\KFUCCP} nmr 10

4

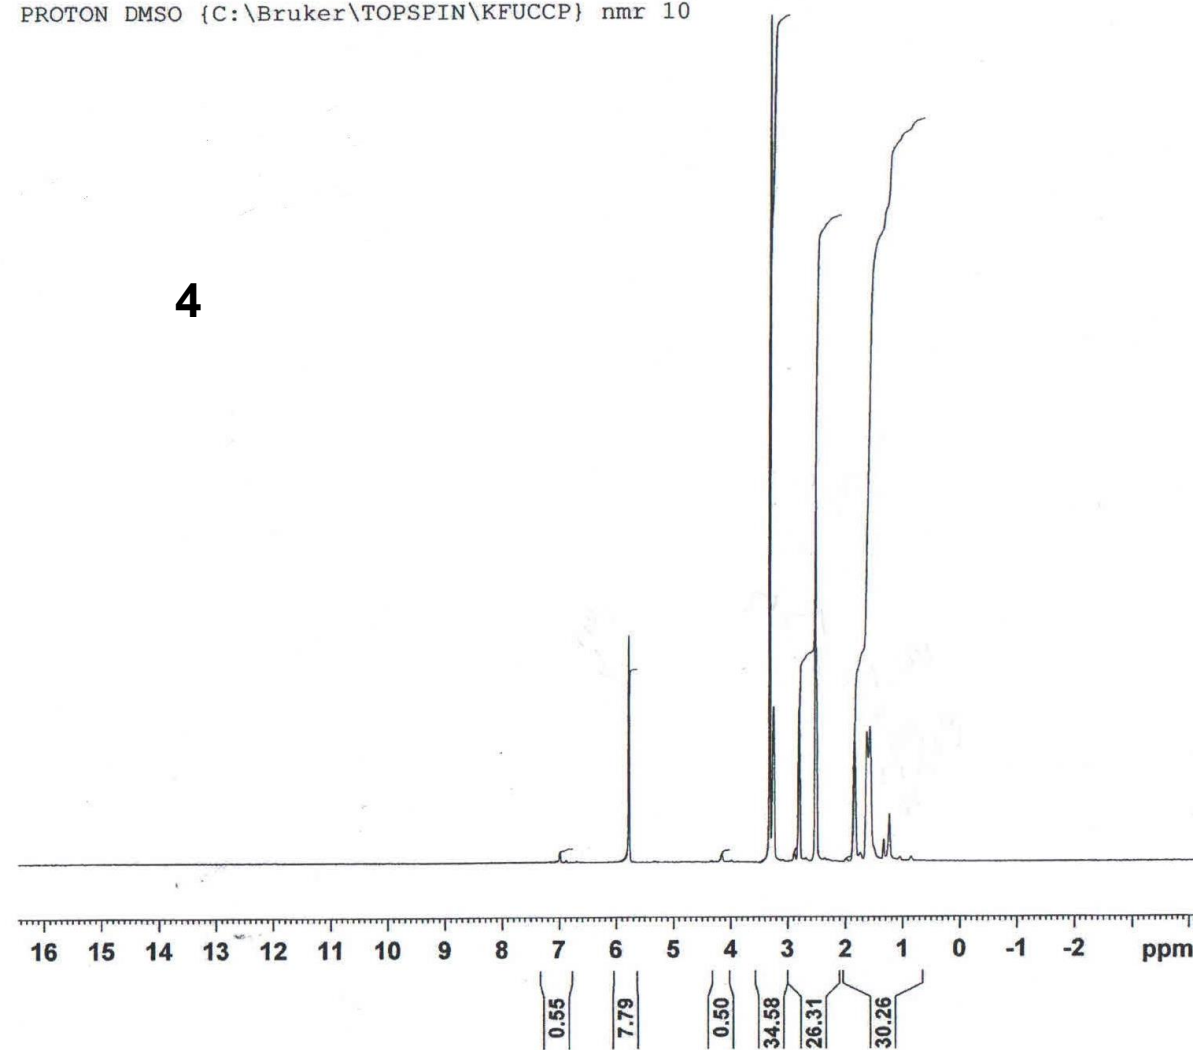

ElshimaaEslam-Y14-DMSO-H

Pulse Sequence: s2pu1

Solvent: DMSO

5

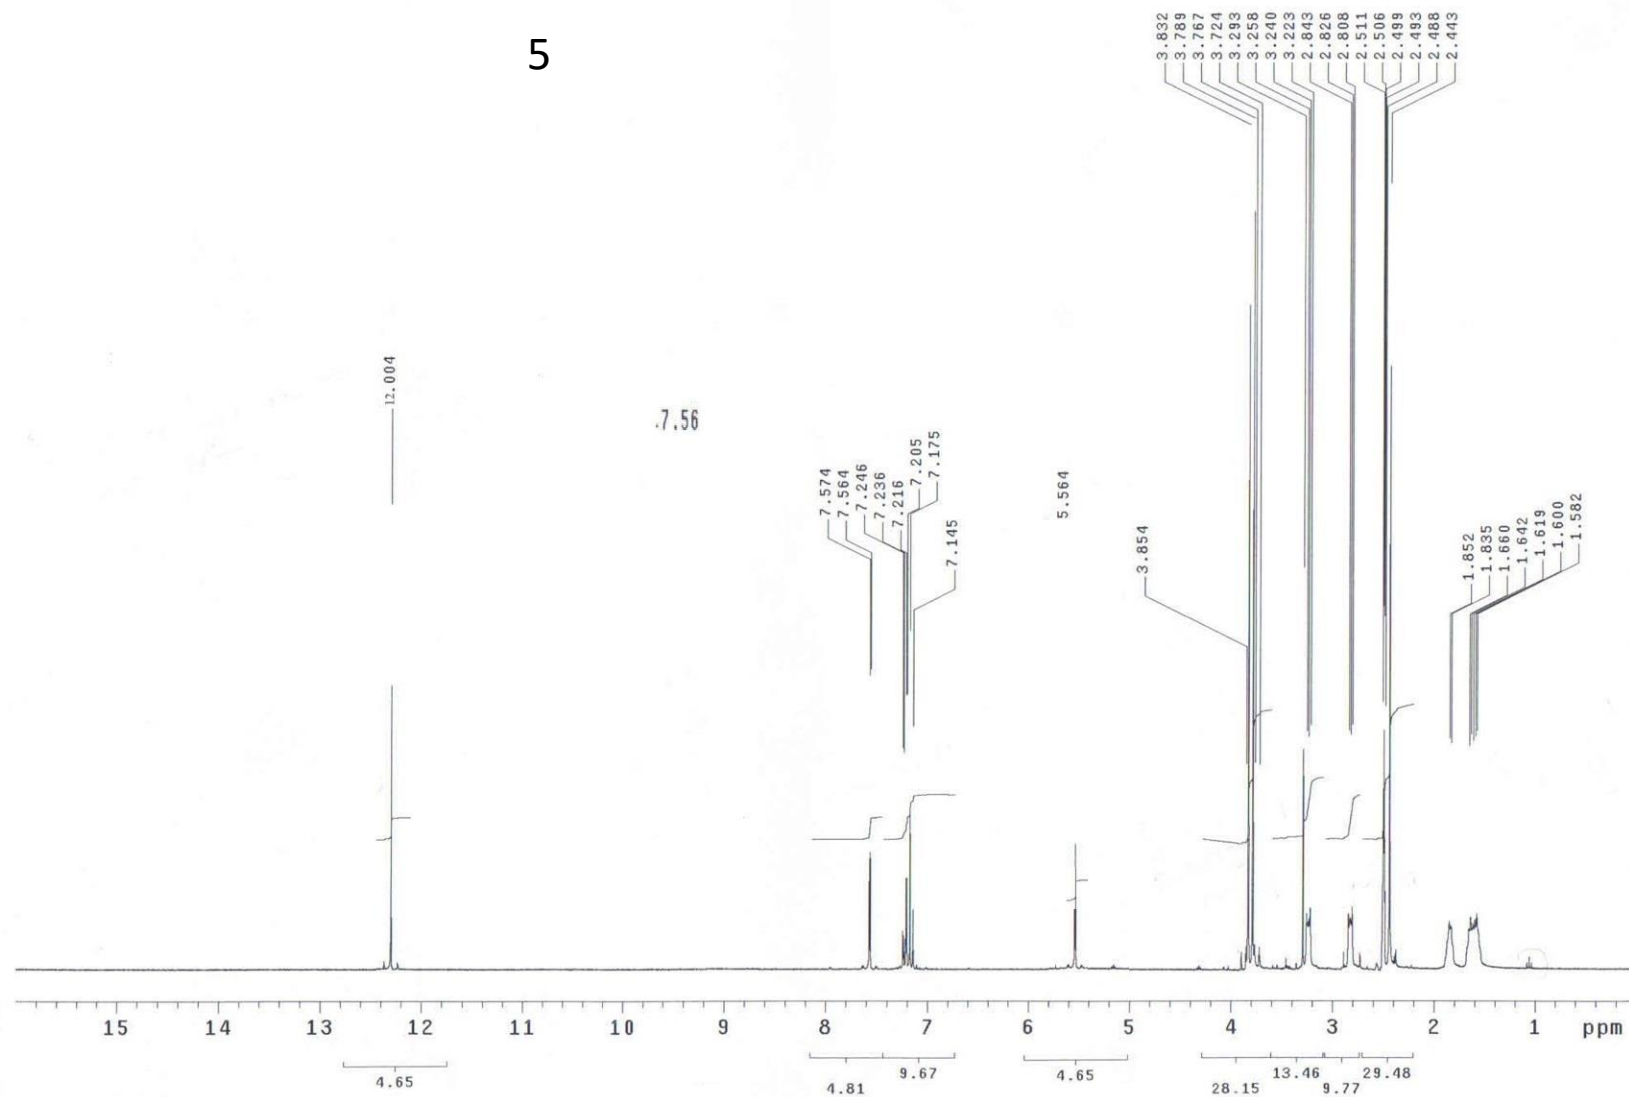

E1shimaaEslam-T8-DMSO-D2O-H

Pulse Sequence: s2pu1

Solvent: DMSO

6

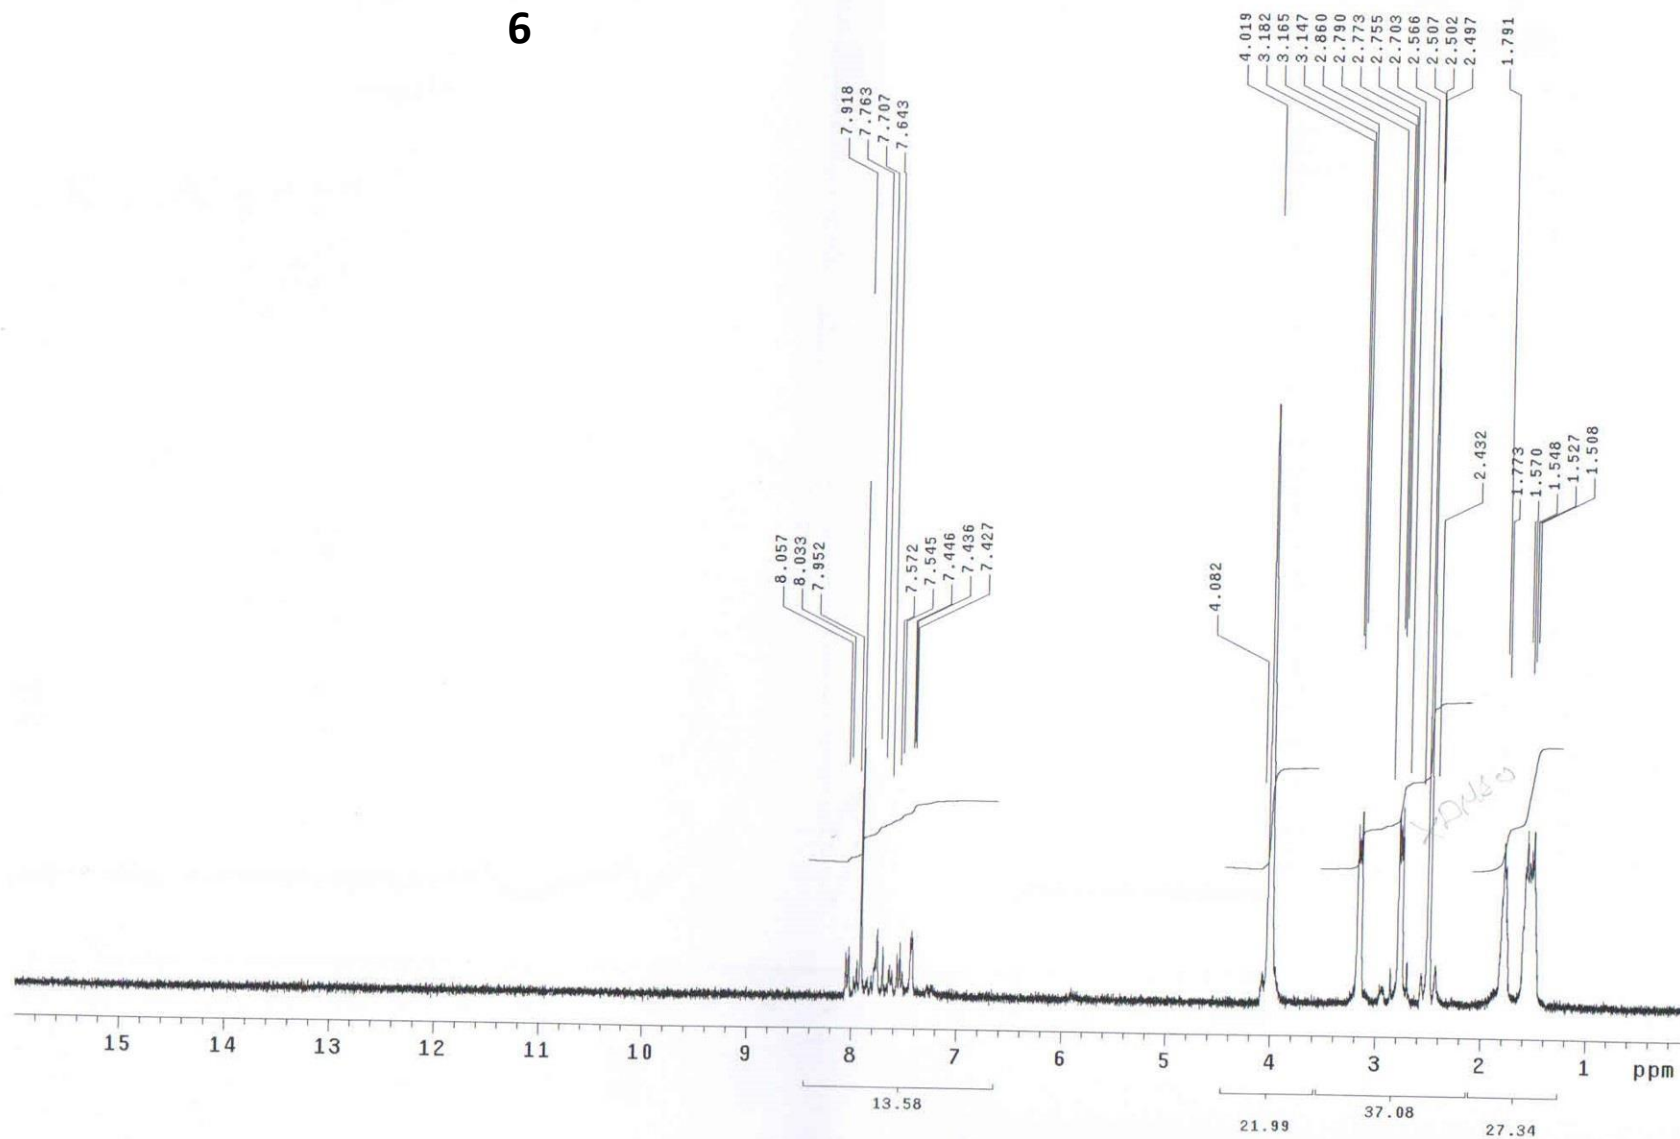



PROTON DMSO {C:\Bruker\TOPSPIN\KFUCCP} nmr 11

7b

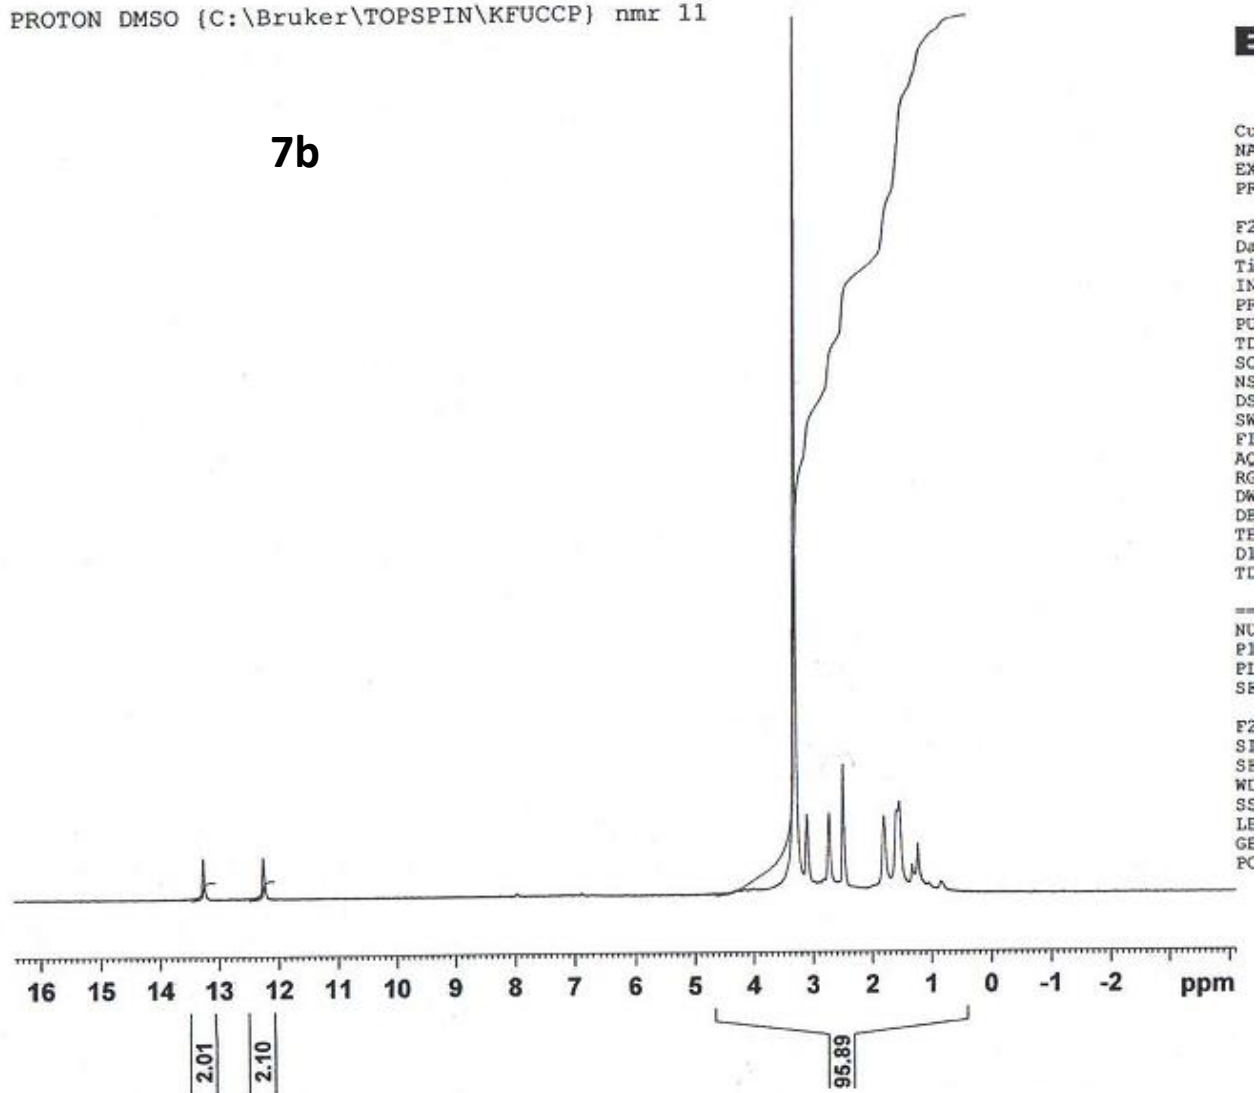

E

Cu  
NP  
EX  
PF  
  
F2  
Da  
Ti  
IN  
PF  
PC  
TI  
SC  
NS  
DS  
SW  
F1  
AQ  
RG  
DW  
DE  
TE  
DI  
TL  
  
==  
NU  
P1  
P1  
SE  
  
F2  
S1  
SE  
WE  
SS  
LE  
GE  
PC

ElshimaaEslam-T7-DMSO-H

Pulse Sequence: s2pu1

Solvent: DMSO

Temp. 30.0 C / 303.1 K

9b

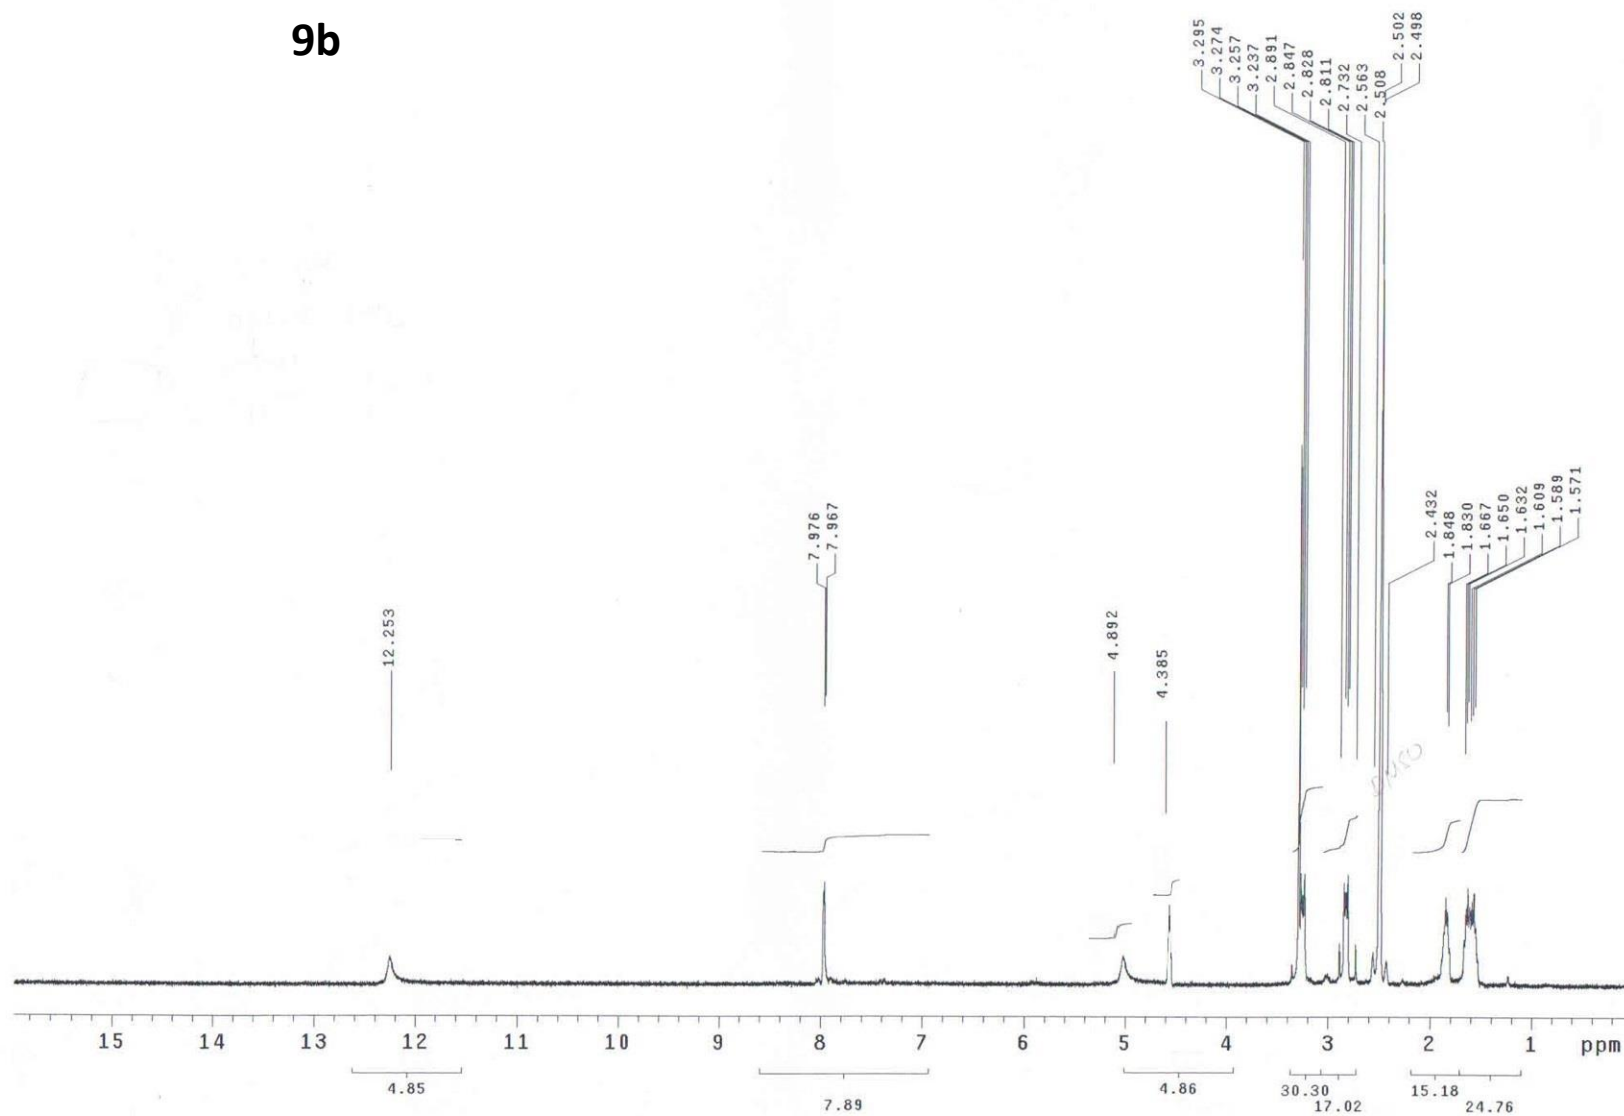

PROTON DMSO {C:\Bruker\TOPSPIN\KFUCCP} nmr 5

10a

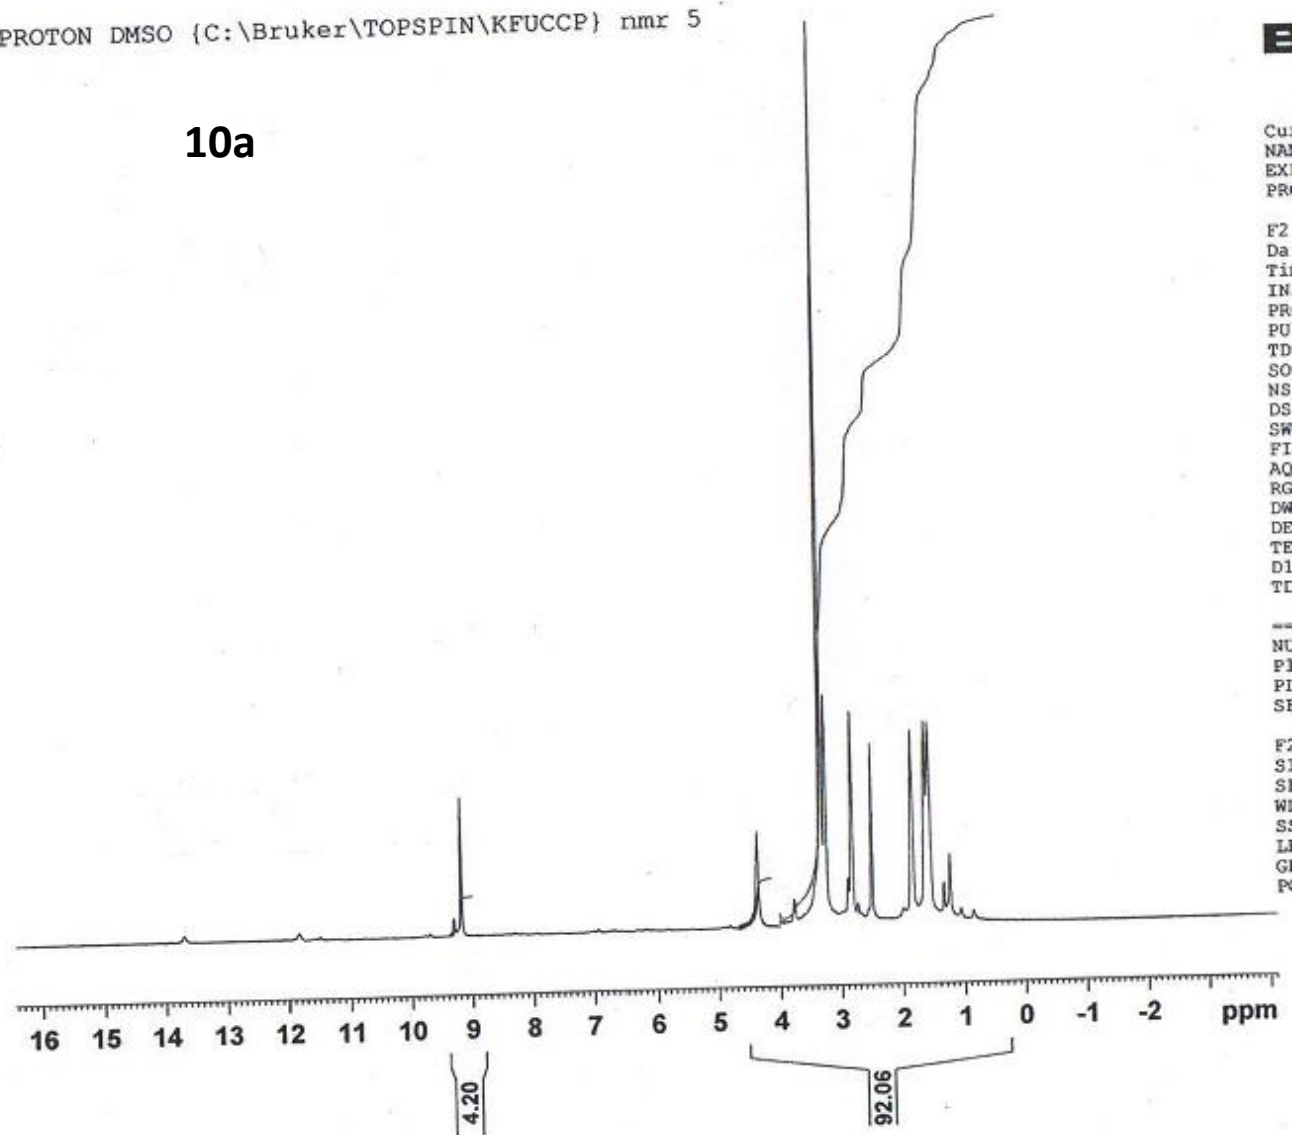

E

Cu:  
NAI  
EXI  
PR

F2  
Da  
Ti  
IN  
PR  
PU  
TD  
SO  
NS  
DS  
SW  
FI  
AQ  
RG  
DW  
DE  
TE  
D1  
TI

--  
NU  
P1  
PI  
SI

F2  
S1  
S1  
W1  
S1  
L1  
G1  
P1

E1shimaaEslam-YB-DMSO-H

Pulse Sequence: s2pu1

Solvent: DMSO

11

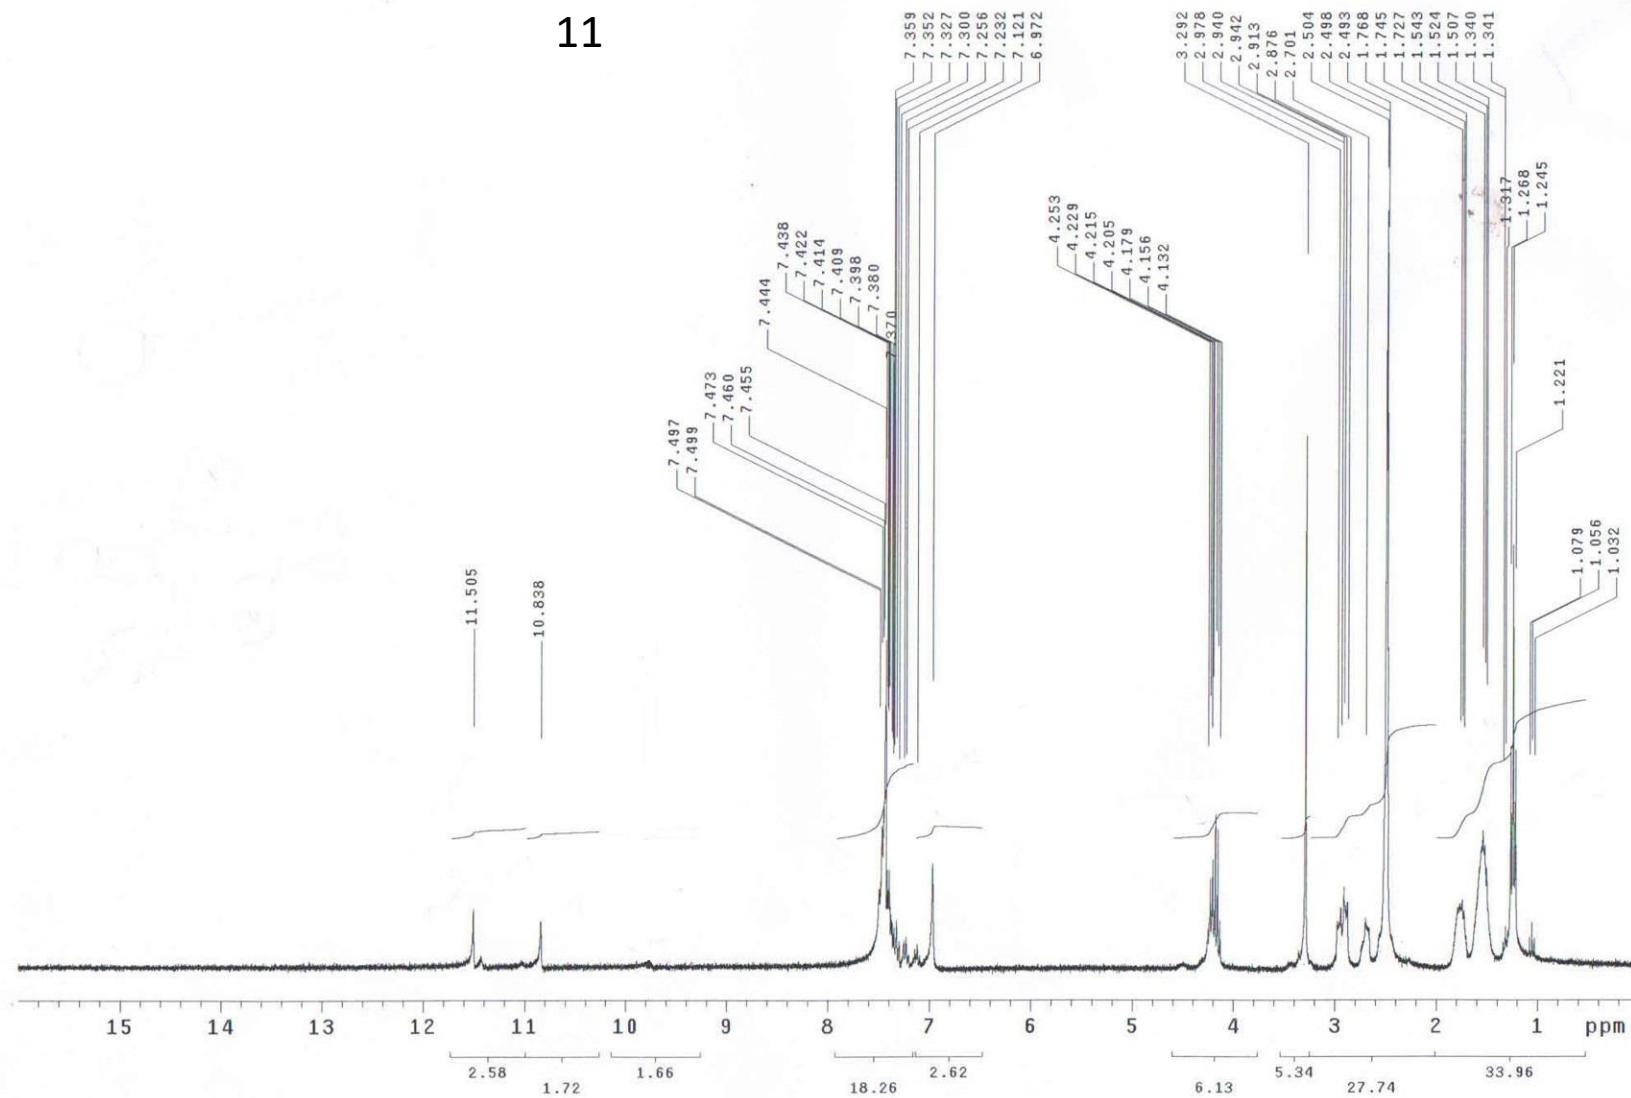

ElshimaaEstam-T8-DMSO-H  
Pulse Sequence: s2pu1  
Solvent: DMSO

12

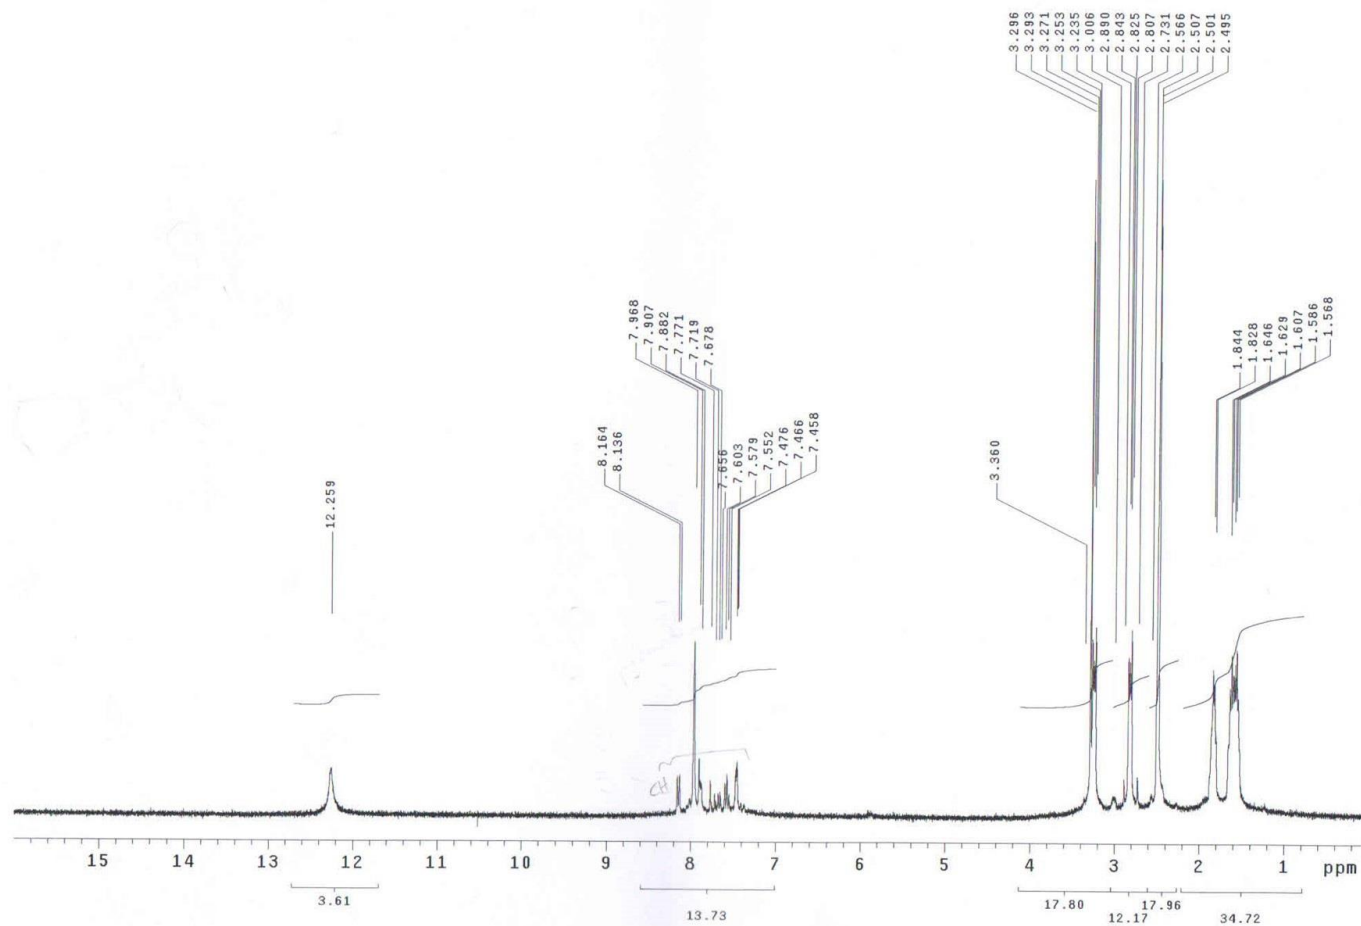

C-13-NMR

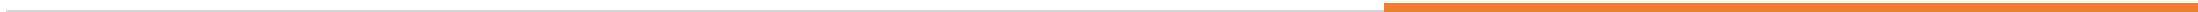

4

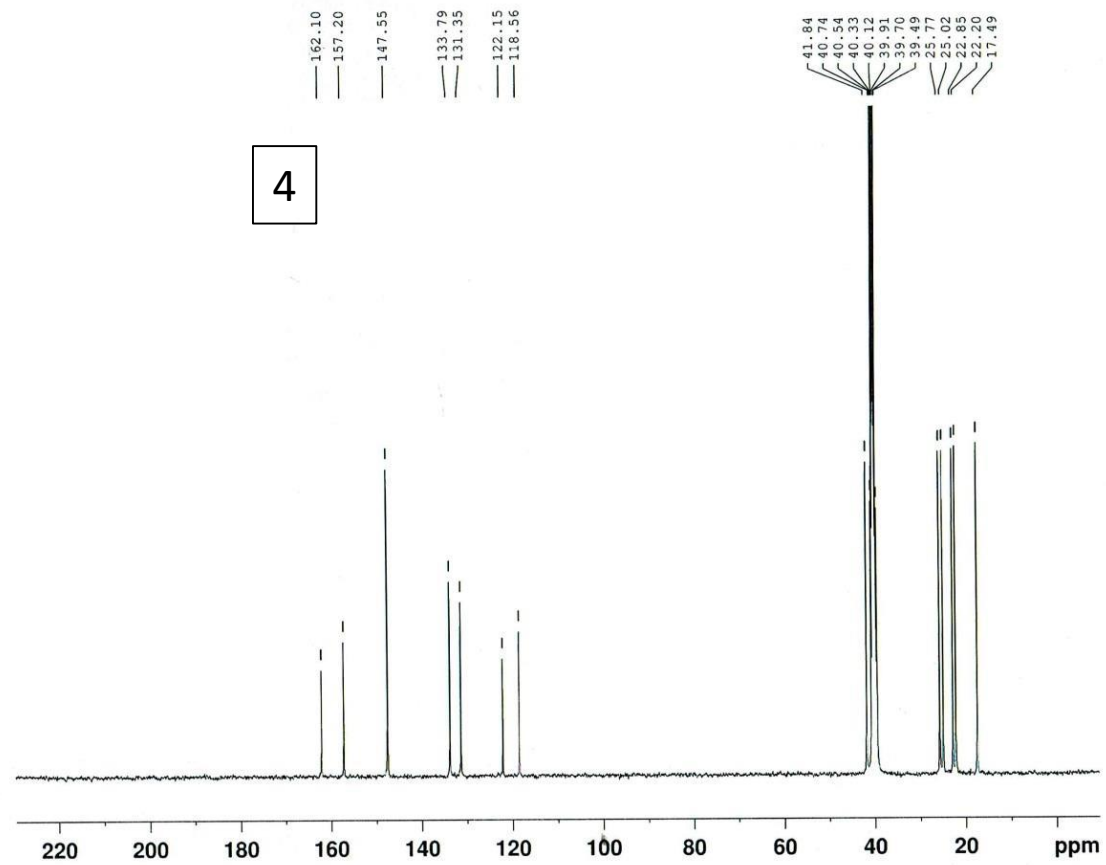

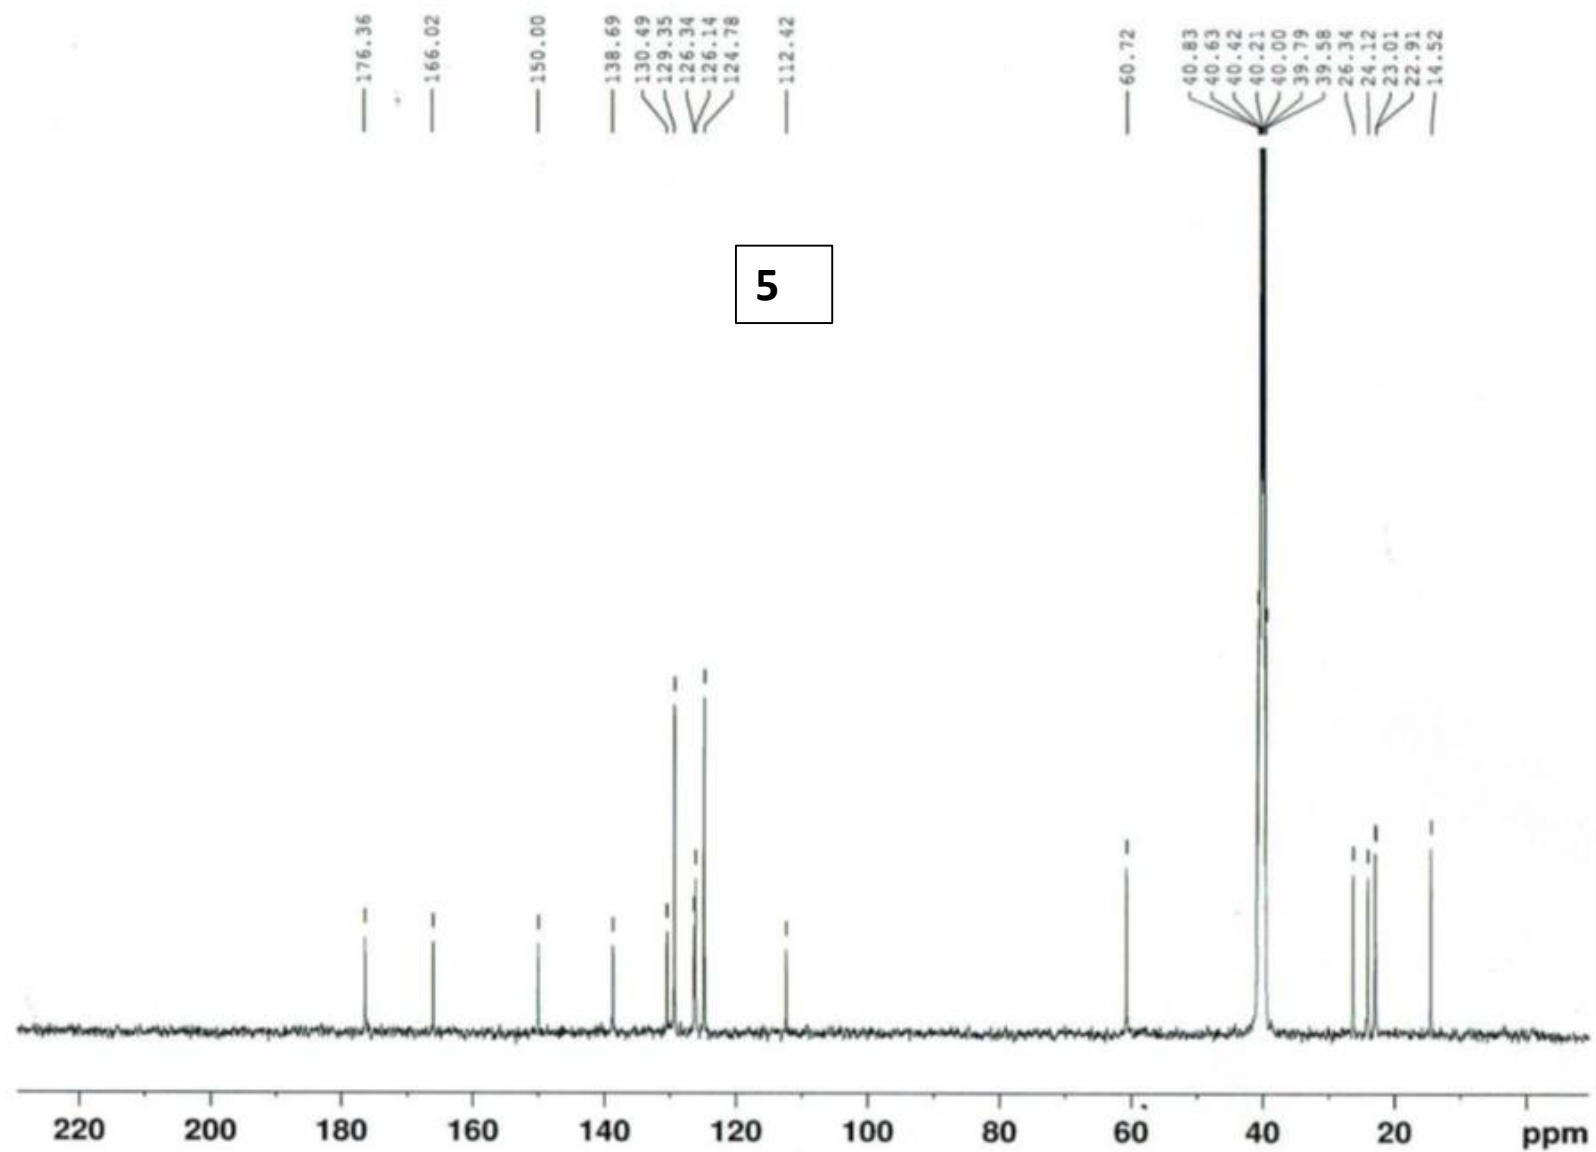



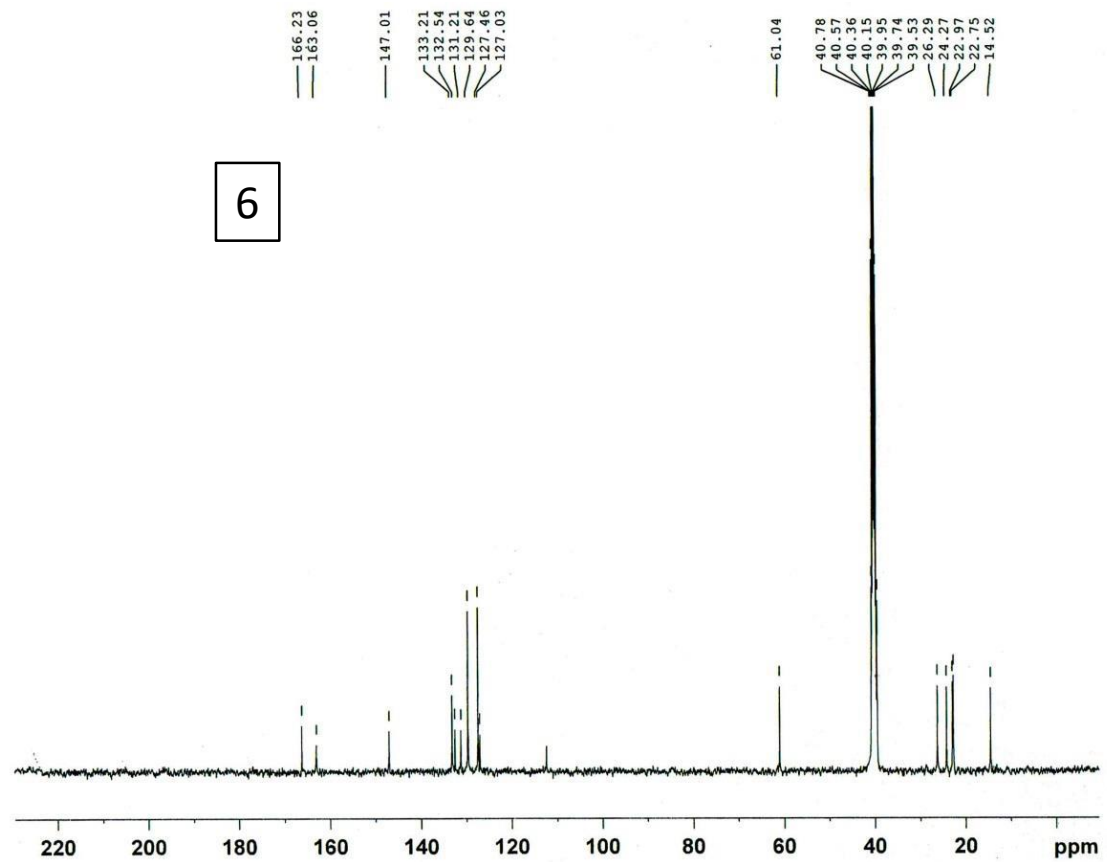

7

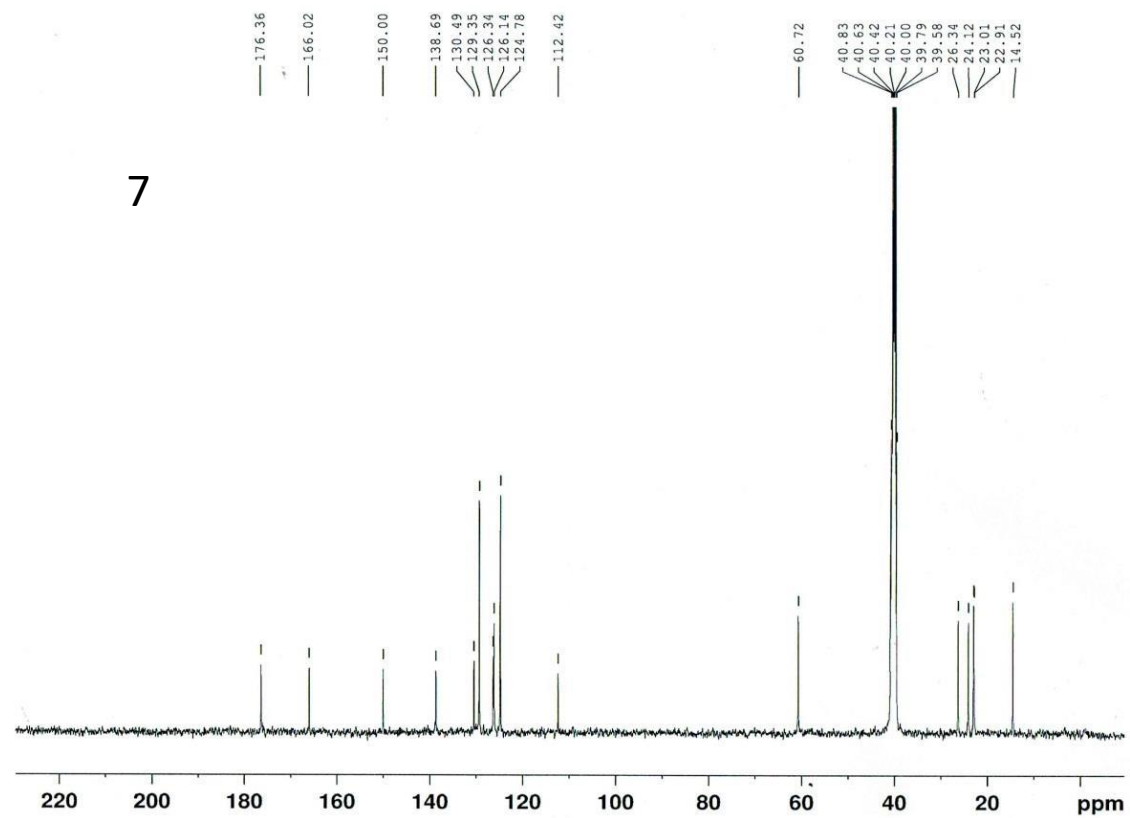

Dr. Alshamaila Islam-Y6-C13-DMSO-Main.Defenc  
e.Chemical.Laboratory2  
expi std13c

8

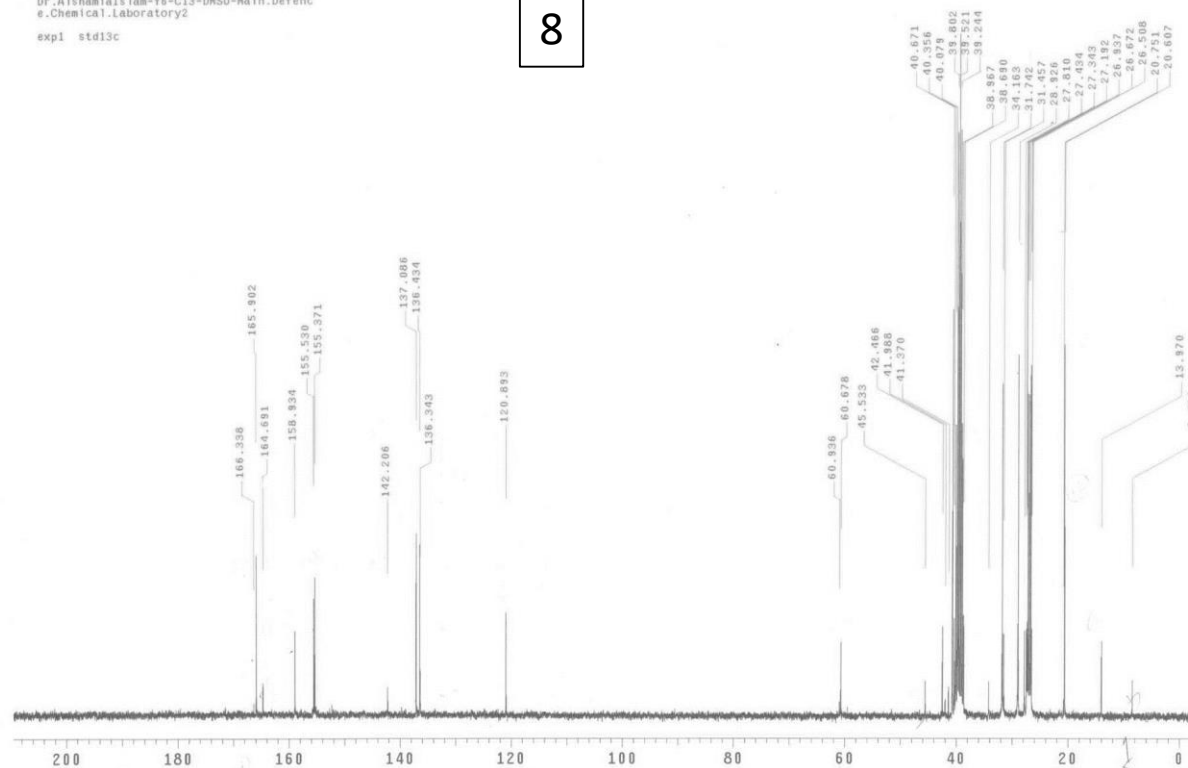

Dr. AlshamlaIslam-Y9-C13-DMSO-Main.Defenc  
e.Chemical.Laboratory2  
expi std13c

9

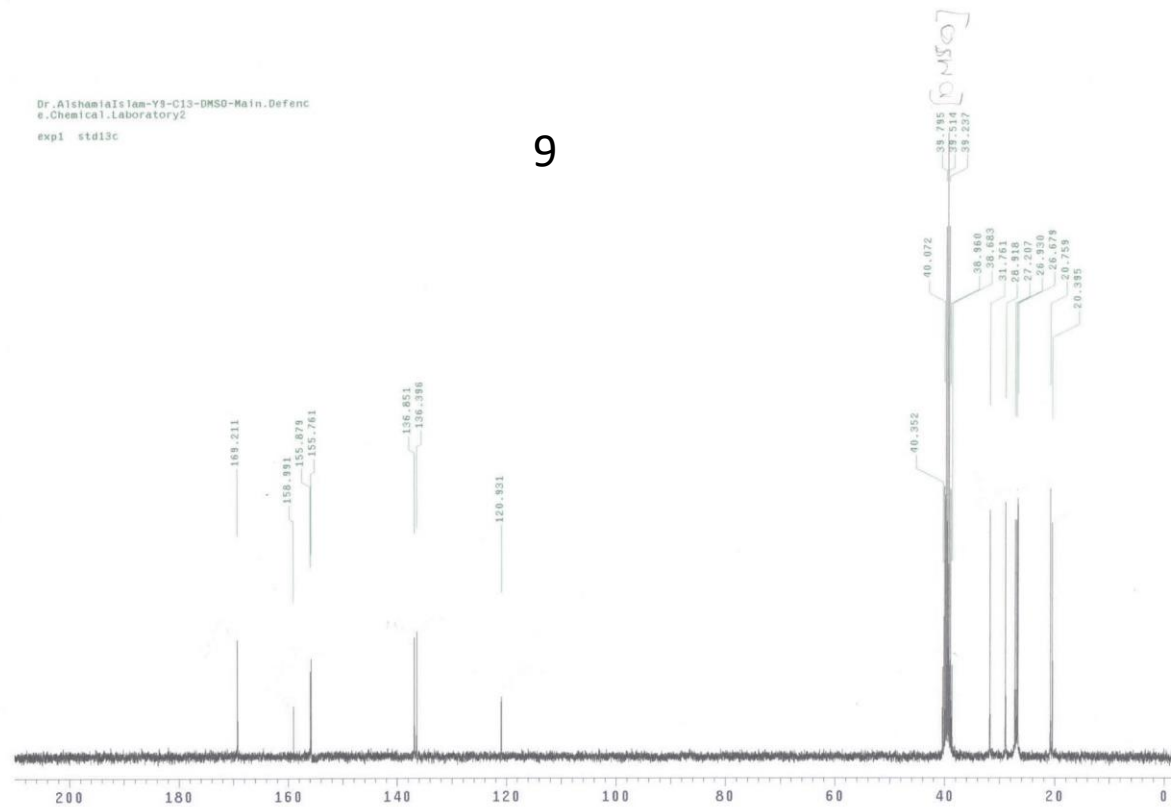

10

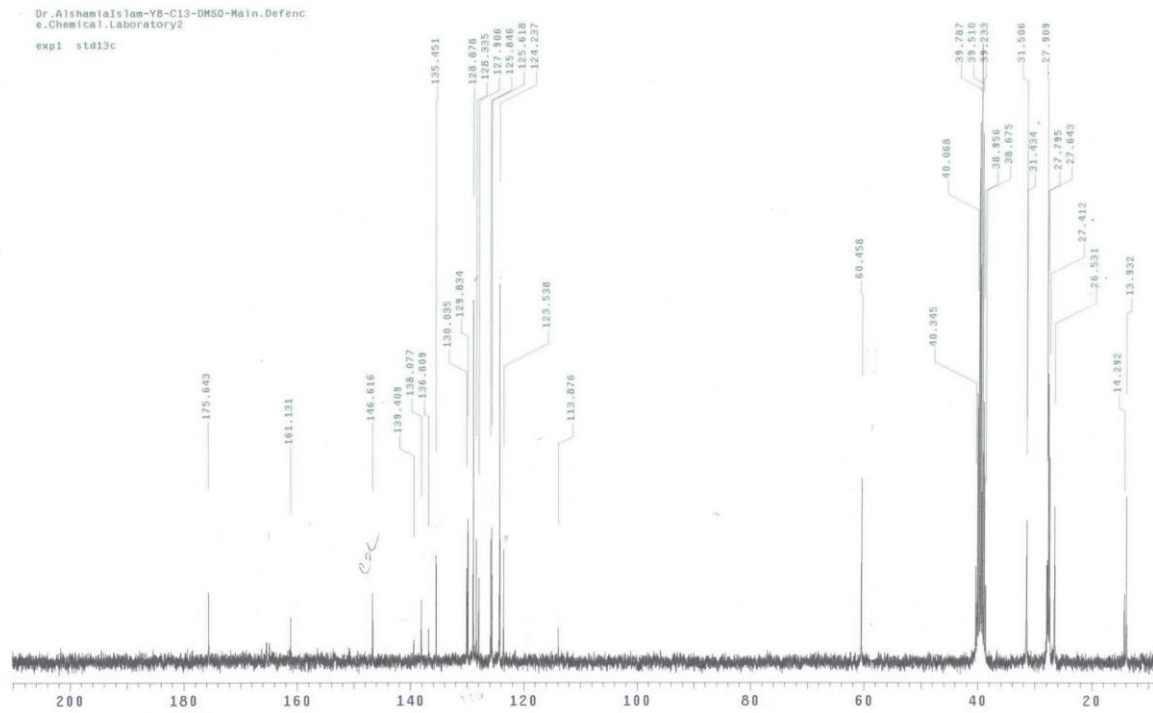

11

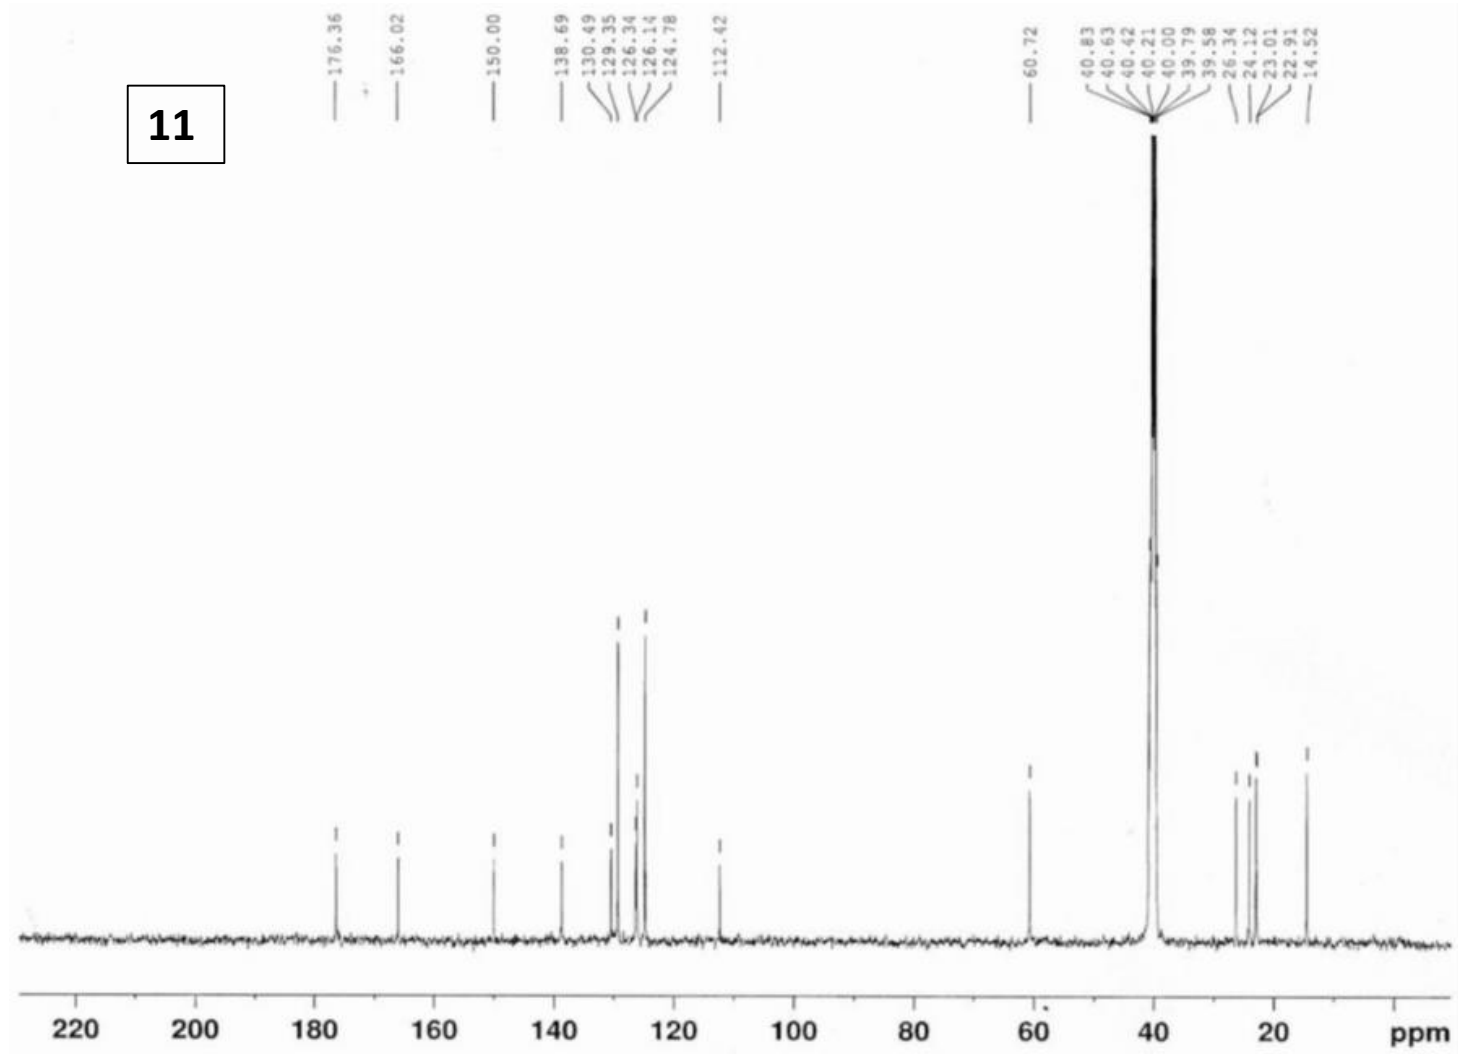

12

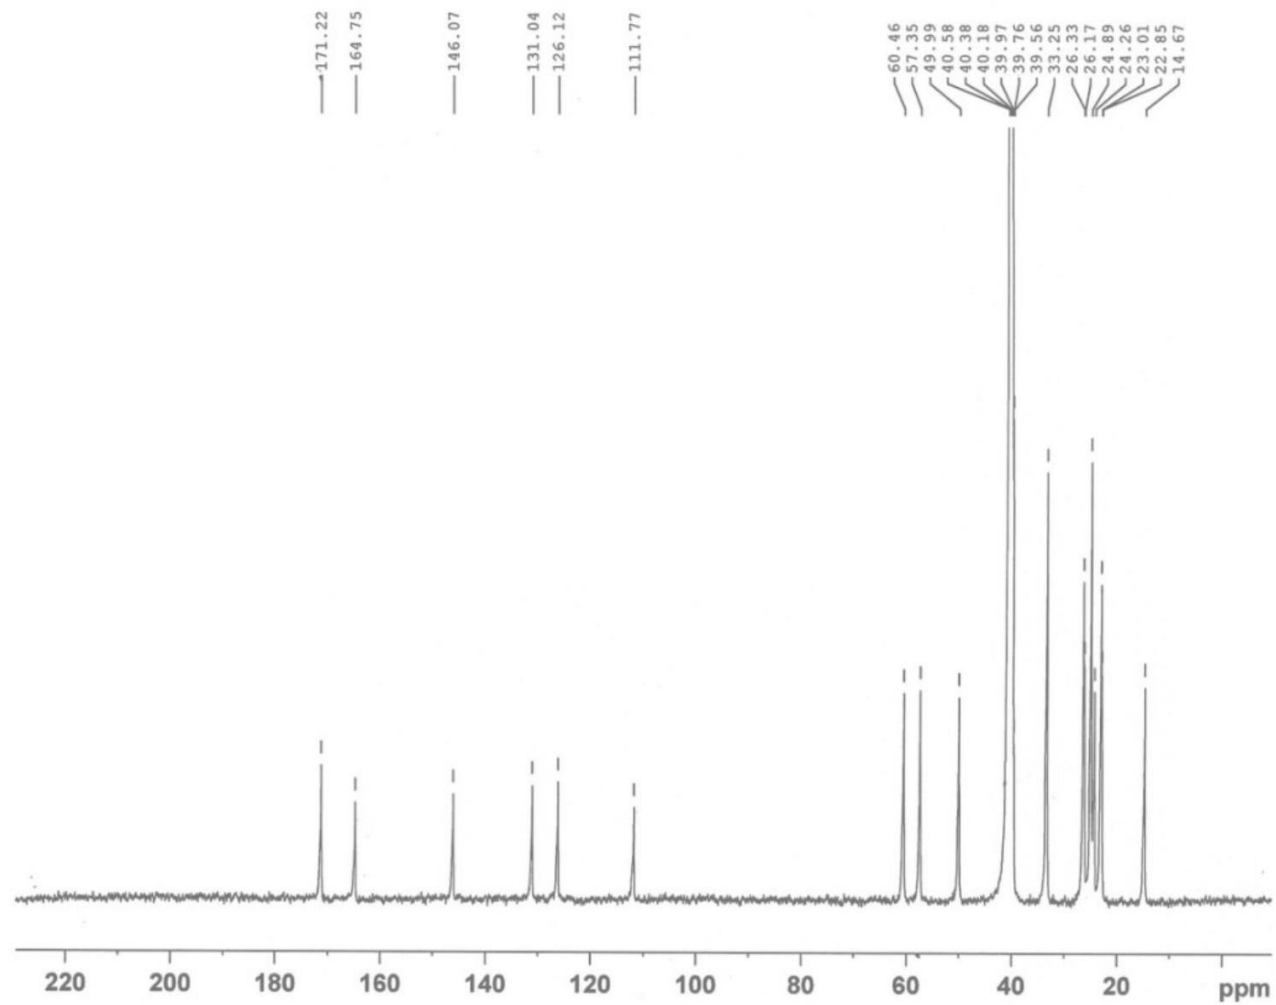

# Target prediction

---



9a

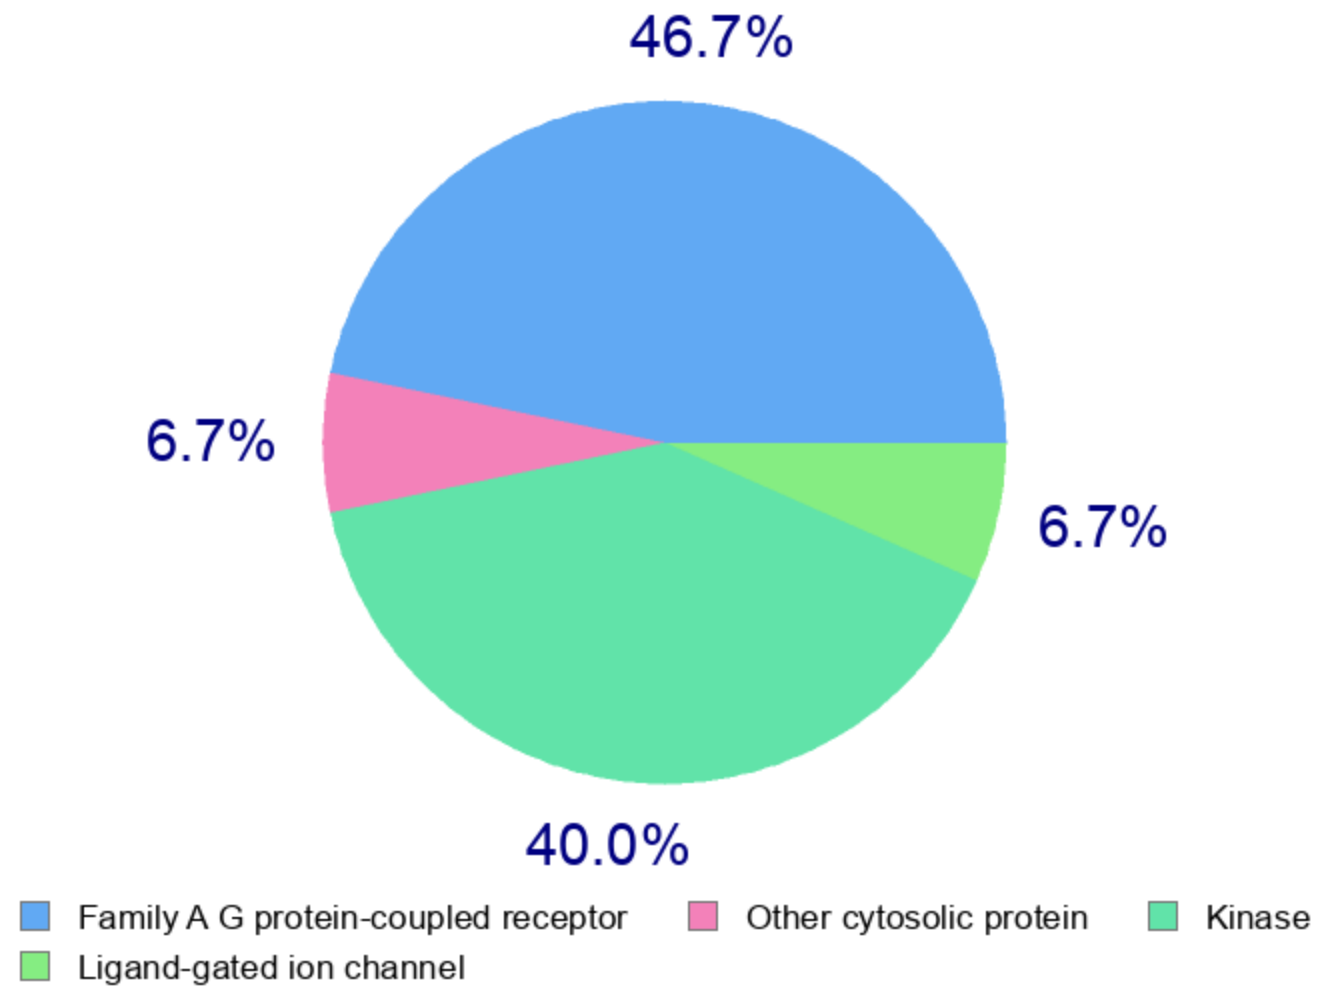

9b

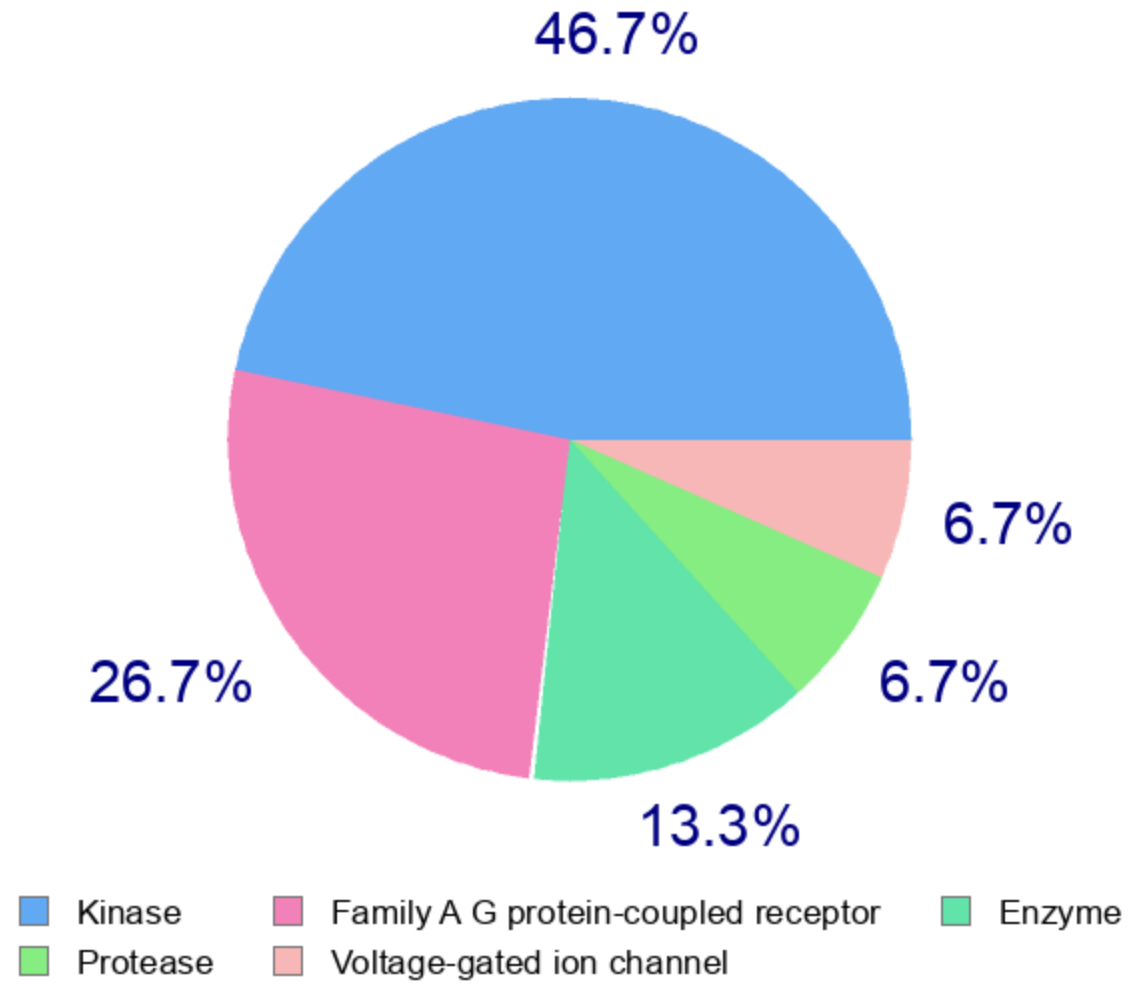

10a

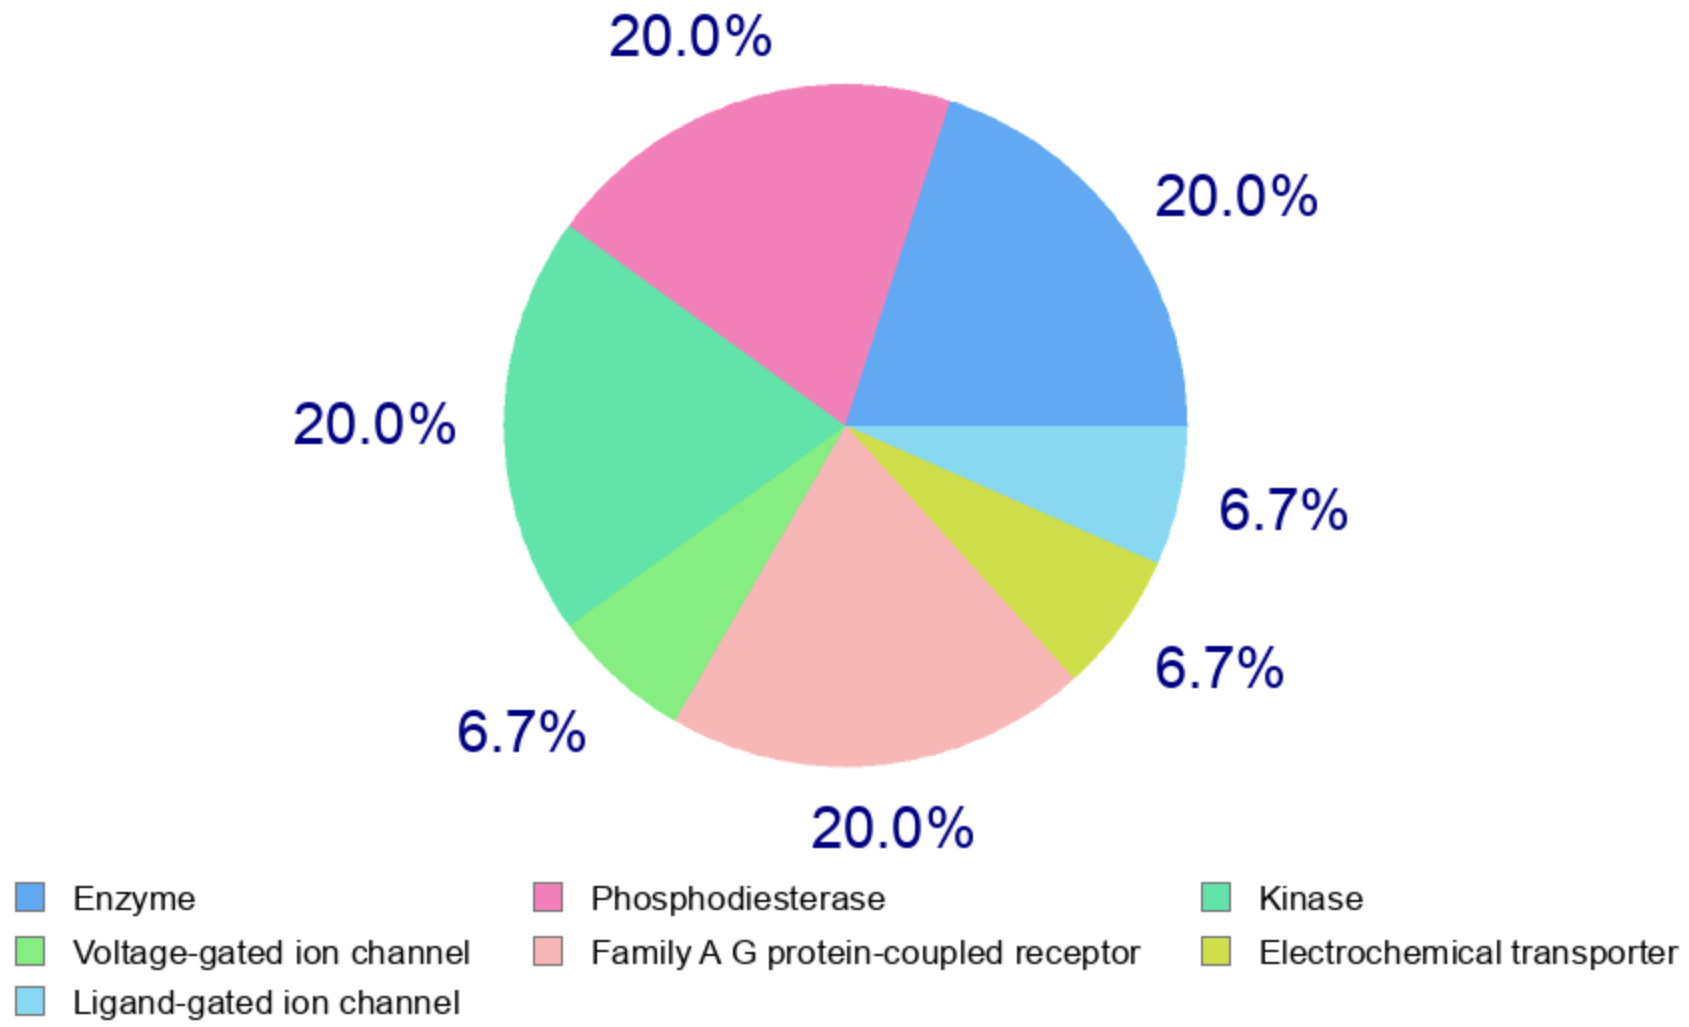

10b

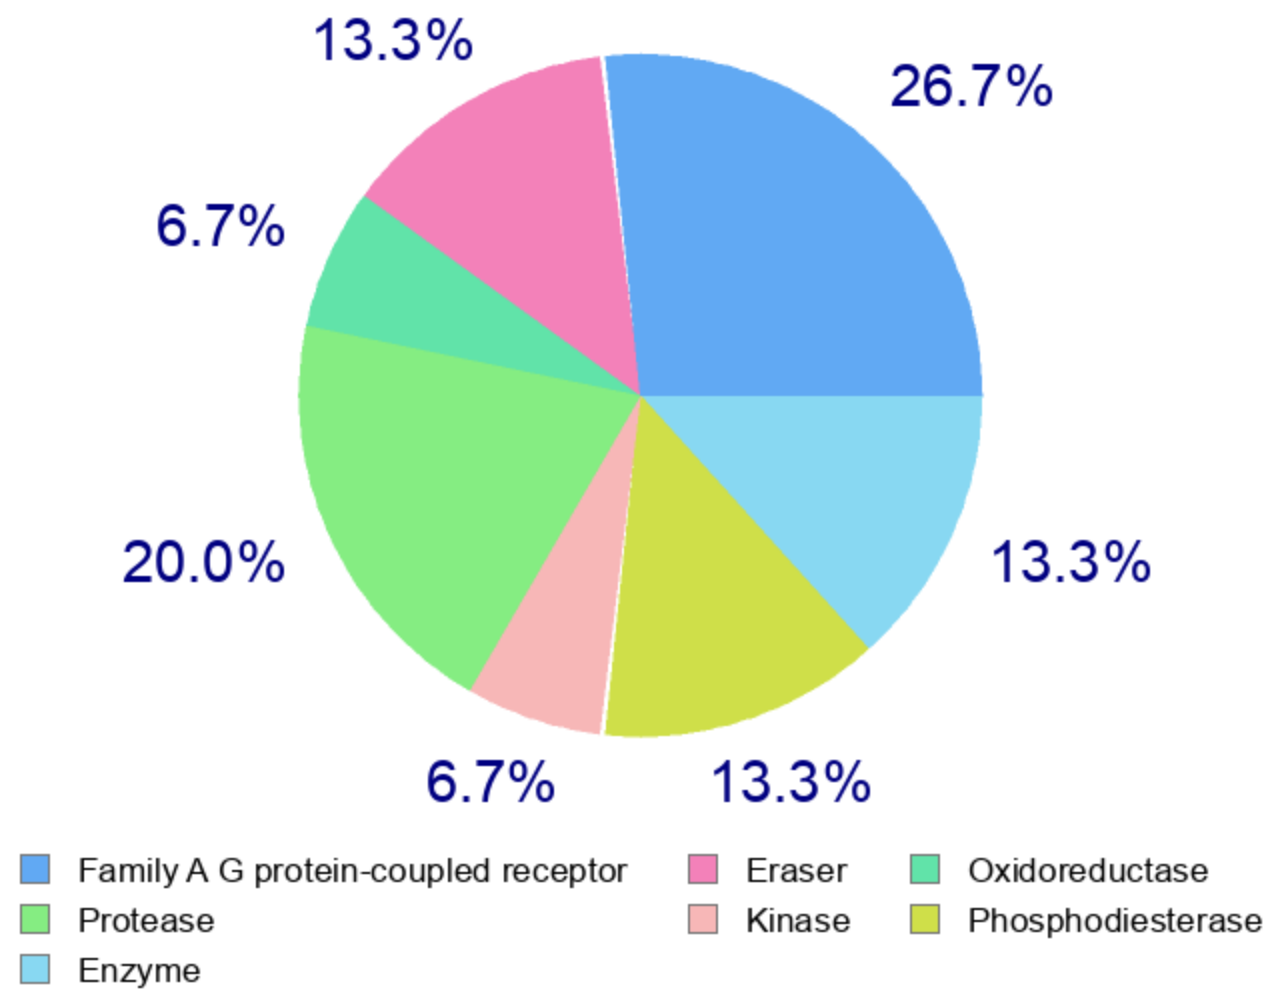

12

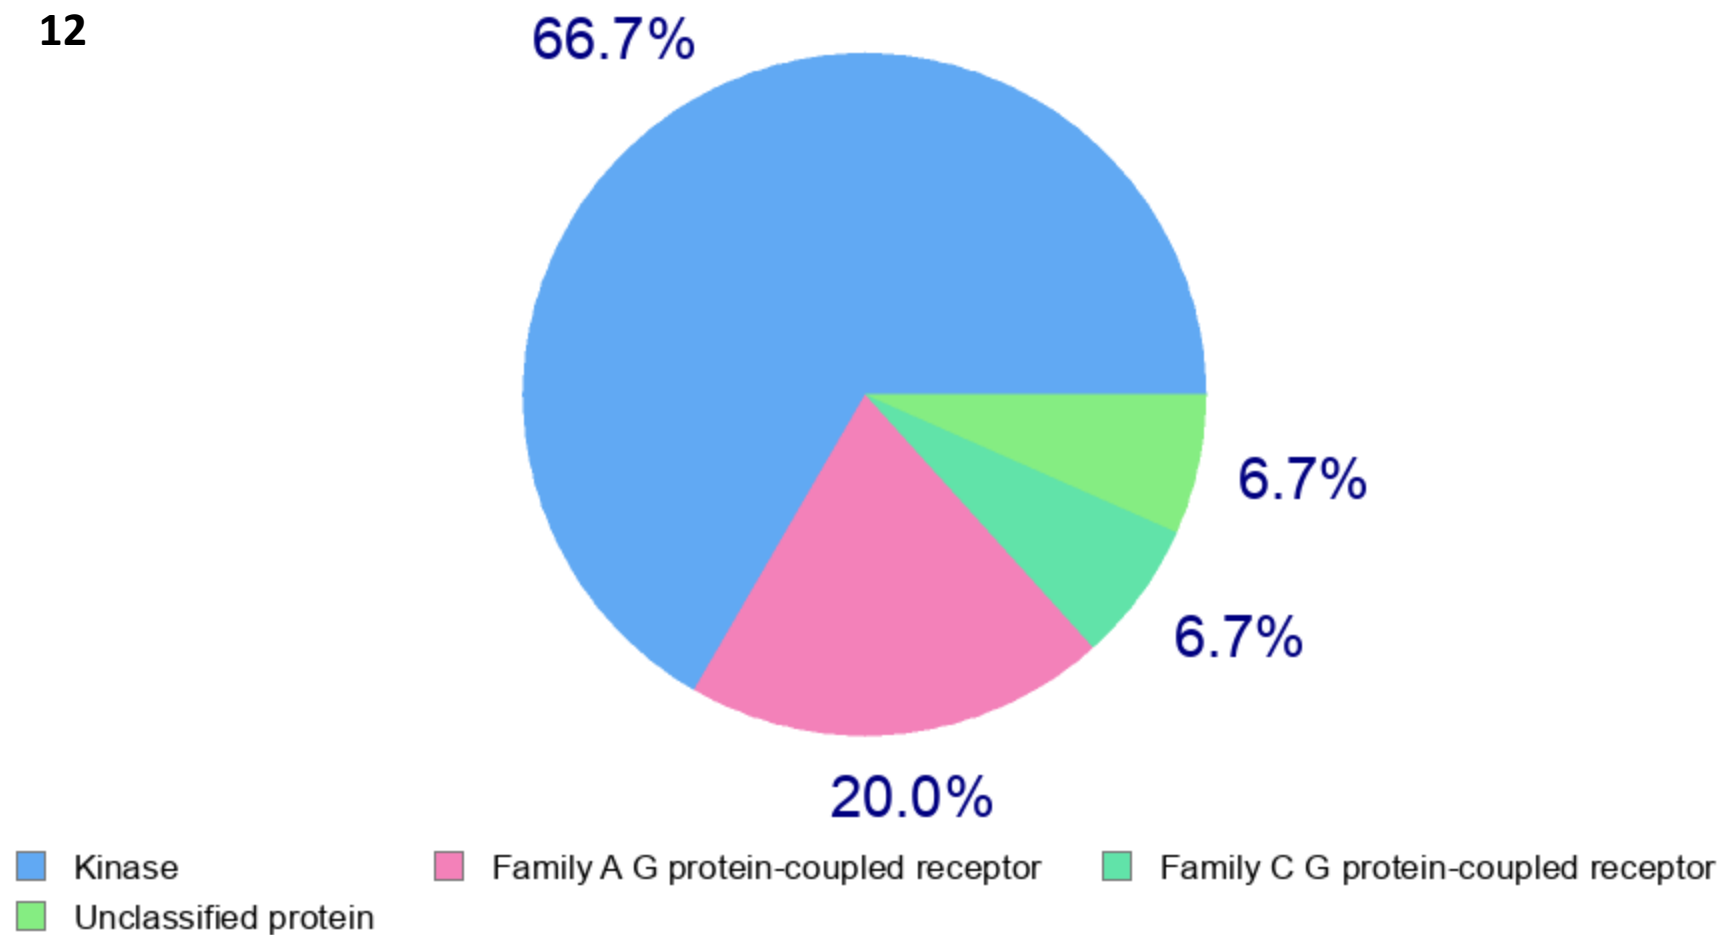

8

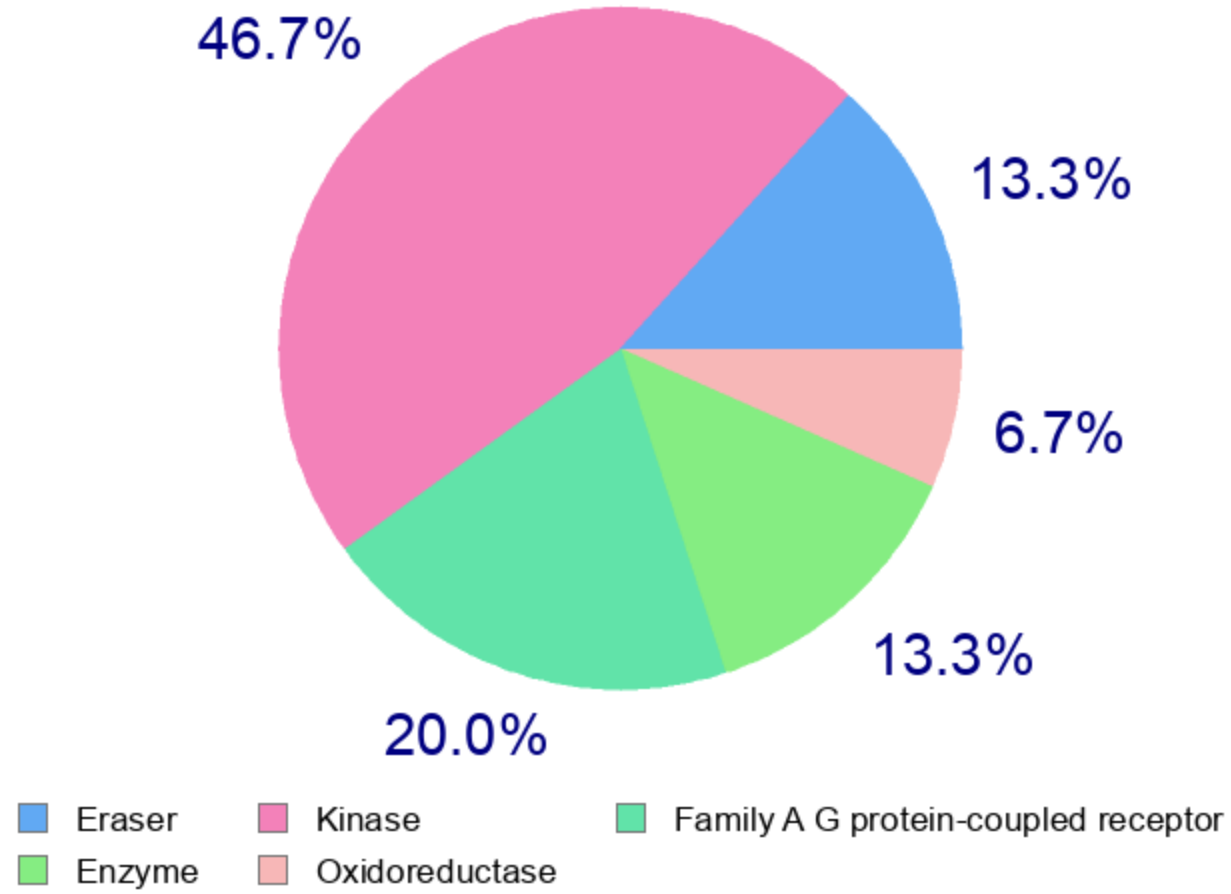

Supplement: s1 [file s1]
